# Supplementary material for: Selective Enrichment and Sequencing of Whole Mitochondrial Genomes in the Presence of Nuclear Encoded Mitochondrial Pseudogenes (Numts)
Source: PubMed Central journal article supplement (PMC3351421; doi:10.1371/journal.pone.0037142), 2012-05-14
Supplement: pone.0037142.s003.pdf [file pone.0037142.s003.pdf]

## Results colour-coded for amino acid conservation

The current colourscheme of the alignment is for **amino acid conservation**.

The conservation scoring is performed by PRALINE. The scoring scheme works from 0 for the least conserved alignment position, up to 10 for the most conserved alignment position. The colour assignments are:

Unconserved 0 1 2 3 4 5 6 7 8 9 10 Conserved

|                 | 10         | 20         | 30         | 40         | 50              |
|-----------------|------------|------------|------------|------------|-----------------|
| Arcyptera_corea | MLILSMS    | IMISFTPMI  | VMLIATILS  | SK KII-N   | DREK SSPFECGFDP |
| Teleogryllus_co | MILIIISII  | ISFTLILSII | LMFLSLTL   | S KKS-LL   | DREK ISPFECGFDP |
| Drosophila_mela | MFSIIFIA   | LLILLITIV  | MFLASILS   | -K KAL-I   | DREK SSPFECGFDP |
| Culex_pipiens_p | MILILLIMS  | CIIFIITIVV | MMLATFLS   | -K KTI-I   | DREK SSPFECGFDP |
| Phlaeoba_albone | MLILSLS    | ILISFIIPMI | VMLIATTL   | SK KLI-N   | DREK SSPFECGFDP |
| Anopheles_darli | MLMLSTM    | TLIIMIITIV | VMILATLL   | SK KTL-T   | DREK CSPFECGFDP |
| Gastrimargus_ma | MMMLMTT    | IIISFLLPMI | IMLMATML   | -S KKSIN   | DWKK GSPFECGFDP |
| Anoplophora_gla | MLIIFLLI   | IMILLIIFIL | IIMLNLS    | -K KSF-S   | DREK SSPFECGFDS |
| Chorthippus_chi | MLTLSTS    | ILISFTMPMM | IMLIATIL   | SK KLI-N   | NREK SSPFECGFDP |
| Thrinchus_schre | MMTLSVTF   | MISFLVPLV  | MLLATILS   | -K KII-N   | DREK SSPFECGFDP |
| Oxya_chinensis  | MLTLFSS    | MTICFIIPMI | VMLIATML   | SK KLI-N   | DREK SSPFECGFDP |
| Teleogryllus_em | MMITSTINYF | QPLFYTIMN  | TLIINFTKKK | DFKMEKNSSH | LS-WGIWIQK      |
| Consistency     | 0016667444 | 5574665377 | 6776656518 | 8450408788 | 5*89888997      |

|                 | 60         | 70          | 80         | 90         | 100         |
|-----------------|------------|-------------|------------|------------|-------------|
| Arcyptera_corea | KSSARMPFSL | RFFLI AVIFL | IFDVEIALIL | PIVIIMKTSN | IMVWTMSSMF  |
| Teleogryllus_co | KSSARLPFSL | RFFLI AVIFL | IFDVEIALIM | PAMIIQMSSN | PLYWIFTLMF  |
| Drosophila_mela | KSSSRLPFSL | RFFLITIIIFL | IFDVEIALIL | PMIIMKYSN  | IMIWTITSII  |
| Culex_pipiens_p | MNYSRLPFSL | RFFLIAIIFL  | IFDVEIALIL | PMILIIKSSN | LLNWSITSLF  |
| Phlaeoba_albone | KSSARMPFSL | RFFLI AVIFL | IFDVEIALIL | PIVIIMKTSN | IMMWTLSTMF  |
| Anopheles_darli | MNSSRLPFSL | RFFLIAIIFL  | IFDVEIALLL | PMIMI KSSN | LINWTITS LF |
| Gastrimargus_ma | KSSARMPFLI | QFFLSAVIFL  | IFDVEIALIL | PILIIMKTSN | IMMWTLSTML  |
| Anoplophora_gla | KNSARLPFSL | QFFLI AVIFL | IFDVEITLLF | PLIITLKISN | MNYSIIFIF-  |
| Chorthippus_chi | KSPARMPFSL | RFFLI AVIFL | IFDVEIVMIL | PIVIIMKTSN | IMMWTMSTMF  |
| Thrinchus_schre | KSSARMPFSL | RFFLI AVIFL | IFDIEIALIL | PIVIIMKSSN | LMIWTSATLF  |
| Oxya_chinensis  | KSSARMPFSL | RFFLI AVIFL | IFDVEIALIL | PIVIIMKTSN | IFVWTMSTMF  |
| Teleogryllus_em | SGGS----VT | DFLLWE--YL  | SKSSEI---F | SCNGGENLRY | NSRGQYWWGS  |
| Consistency     | 7768878878 | 7*9*78789*  | 8898**6777 | 8677767588 | 654765565   |

|                 | 110        | 120               |
|-----------------|------------|-------------------|
| Arcyptera_corea | FIMILLLG-- | LYYEWNQG ALQWAE   |
| Teleogryllus_co | FILILLLG-- | LYHEWNQG ALQWAE   |
| Drosophila_mela | FILILLIG-- | LYHEWNQG MLNWSN   |
| Culex_pipiens_p | FIFILLIG-- | LYHEWNQG ALEWNN   |
| Phlaeoba_albone | FIMVLLGG-- | LYHEWNQG ALQWAE   |
| Anopheles_darli | FIFILIVG-- | LYHEWNQG ALEWNE   |
| Gastrimargus_ma | FIIILLIG-- | LYYEWNQG AFKWAK   |
| Anoplophora_gla | FIMILIFG-- | LFHEWNQG ALNWAY   |
| Chorthippus_chi | FILVLLSG-- | LYYEWNQG ALQWAD   |
| Thrinchus_schre | FILVLLGG-- | LYHEWNQG ALQWAE   |
| Oxya_chinensis  | FIIIVLLG-- | LYFEWNQG ALKWAE   |
| Teleogryllus_em | LFPTHYYGGV | PPVILEWNQG VLQWAE |
| Consistency     | 9958883*00 | 00986*****896*76  |
