# Supplementary material for: Selective Enrichment and Sequencing of Whole Mitochondrial Genomes in the Presence of Nuclear Encoded Mitochondrial Pseudogenes (Numts)
Source: PubMed Central journal article supplement (PMC3351421; doi:10.1371/journal.pone.0037142), 2012-05-14
Supplement: pone.0037142.s004.pdf [file pone.0037142.s004.pdf]

## Results colour-coded for secondary structure

The current colourscheme of the alignment is for **secondary structure type**.

The 3-state (H, E C) secondary structure for each sequence is represented by a colour. If a sequence in the alignment has no colours assigned, this means that either there is no DSSP information available (if this was requested), or that no prediction was possible for that sequence (if this was requested).

The colour assignments are:

**HELIX (H)** **STRAND (E)** You have selected to perform secondary structure prediction using **DSSP** (Kabsch and Sander, 1983) and **PSIPRED** (Jones, 1999).

```

      . . . . . 10 . . . . . 20 . . . . . 30 . . . . . 40 . . . . . 50
(PRED) Arcyptera_corea ---MLILSMS IMISFTMPMI VMLIATILSK KII-N-DREK SSPFECGFDP
(PRED) Teleogryllus_co --MILIISII ISFTLILSII LMFLSLTL-S KKS-LLDREK ISPFECGFDP
(PRED) Drosophila_mela --MFSIIFIA LLILLITTIV MFLASILS-K KAL-I-DREK SSPFECGFDP
(PRED) Culex_pipiens_p -MILILLIMS CIIFIITIV MMLATFLS-K KTI-I-DREK SSPFECGFDP
(PRED) Phlaeoba_albone ---MLILSLS ILISFIIPMI VMLIATTL SK KLI-N-DREK SSPFECGFDP
(PRED) Anopheles_darli ---MLMLSTM TLIIMIITIV VMILATLLS K KTL-T-DREK CSPFECGFDP
(PRED) Gastrimargus_ma ---MMMLMTT IIISFLLPMI IMLMATML-S KKSIN-DWKK GSPFECGFDP
(PRED) Anoplophora_gla --MLIIFLLI IMILLIIFIL IIMLNLS-K KSF-S-DREK SSPFECGFDS
(PRED) Chorthippus_chi ---MLTLSTS ILISFTMPMM IMLIATILSK KLI-N-NREK SSPFECGFDP
(PRED) Thrinchus_schre --MMLTSLVTF MISFLVPLV MLLATILS-K KII-N-DREK SSPFECGFDP
(PRED) Oxya_chinensis_ ---MLTLFSS MTICFIIPMI VMLIATMLSK KLI-N-DREK SSPFECGFDP
(PRED) Teleogryllus_em MMITSTINYF QPLFYTIIMN TLIINFTKKK DF KMEKNSSH LS-WGIWIQK

      . . . . . 60 . . . . . 70 . . . . . 80 . . . . . 90 . . . . . 100
(PRED) Arcyptera_corea KSSARMPFSL RFFLIIVIFL IFDVEIALIL PIVIIMKTSN IMVWTMSSMF
(PRED) Teleogryllus_co KSSARLPFSL RFFLIIVIFL IFDVEIALIM PAMIIQMSSN PLYWIFTLMF
(PRED) Drosophila_mela KSSSRLPFSL RFFLITIIIFL IFDVEIALIL PMIIIMKYSN IMIWTITSII
(PRED) Culex_pipiens_p MNYSRLPFSL RFFLIAIIFL IFDVEIALIL PMILIIKSSN LLNWSITSIF
(PRED) Phlaeoba_albone KSSARMPFSL RFFLIIVIFL IFDVEIALIL PIVIIMKTSN IMMWTLSTMF
(PRED) Anopheles_darli MNSSRLPFSL RFFLIAIIFL IFDVEIALLL PMIMIIKSSN LINWTITSIF
(PRED) Gastrimargus_ma KSSARMPFLI QFFLSAVIFL IFDVEIALIL PILIIMKTSN IMMWTLSTML
(PRED) Anoplophora_gla KNSARLPFSL QFFLIIVIFL IFDVEITLLF PLIITLKISN MNYSIIFIF-
(PRED) Chorthippus_chi KSPARMPFSL RFFLIIVIFL IFDVEIVMIL PIVIIMKTSN IMMWTMSTMF
(PRED) Thrinchus_schre KSSARMPFSL RFFLIIVIFL IFDIEIALIL PIVIIMKSSN LMIWTSATLF
(PRED) Oxya_chinensis_ KSSARMPFSL RFFLIIVIFL IFDVEIALIL PIVIIMKTSN IFVWTMSTMF
(PRED) Teleogryllus_em SGGSGS---VT DFLLEW--YL SKSSEI---F SCNGGENLRY NSRGQYWWGS

      . . . . . 110 . . . . . 120 . . . . .
(PRED) Arcyptera_corea FIMILLLG-- --LYYEWNOG ALQWAE
(PRED) Teleogryllus_co FILILLLG-- --LYHEWNOG ALQWAE
(PRED) Drosophila_mela FILILLIG-- --LYHEWNOG MLNWSN
(PRED) Culex_pipiens_p FIFILLIG-- --LYHEWNOG ALEWNN
(PRED) Phlaeoba_albone FIMVLLGG-- --LYHEWNOG ALQWAE
(PRED) Anopheles_darli FIFILIVG-- --LYHEWNOG ALEWNE
(PRED) Gastrimargus_ma FIILLLIG-- --LYYEWNOG AFKWAK
(PRED) Anoplophora_gla FIMILIFG-- --LFHEWNOG ALNWAY
(PRED) Chorthippus_chi FILVLLSG-- --LYYEWNOG ALQWAD
(PRED) Thrinchus_schre FILVLLGG-- --LYHEWNOG ALQWAE
(PRED) Oxya_chinensis_ FIIVLLGG-- --LYFEWNOG ALKWAE
(PRED) Teleogryllus_em LFPTHYGGV PPVILEWNOG VLQWAE

```
